# Supplementary material for: Analysis of Genome-Wide Changes in the Translatome of Arabidopsis Seedlings Subjected to Heat Stress
Source: PubMed Central journal article supplement (PMC3747205; doi:10.1371/journal.pone.0071425), 2013-08-19
Supplement: pone.0071425.s003.pdf [file pone.0071425.s003.pdf]

**Table S1. Primer sequence of the genes used in this study for the analysis by qRT-PCR.**

| <b>Gen (TAIR ID)</b> | <b>Forward primer (5'-3')</b> | <b>Reverse primer (5'-3')</b> |
|----------------------|-------------------------------|-------------------------------|
| <b>At1g12240</b>     | GACACGAGGTTGATCATTATGCTG      | GACCGACCTCGAGATCAAATTGC       |
| <b>At1g20630</b>     | CGCCATGCCGAAAAATACCC          | CTTGCCTGTCTGAATCCCAGGAC       |
| <b>At1g27730</b>     | GCTTCTCCGATTCTCTCTTT          | TCTTGTGCGAGACGCTACAC          |
| <b>At1g52890</b>     | GTTCCACGGTCTTGCGGATAC         | GCTCAACATTACCGGCAAACTAG       |
| <b>At1g74970</b>     | TTCTTCGTTGAGCGACAATG          | AGATACCGTGGCGGTGATAG          |
| <b>At2g21580</b>     | GCCAAAGAAGGATAAGGTTCCACCA     | CCTCGCAAGAGACCCATTAATCCTC     |
| <b>At2g23170</b>     | CGGTTTGGTCTCAAGGGATTAC        | GTCGGTCCATGTCTTCAATGG         |
| <b>At2g42740</b>     | CGTTTCGTTCTCCGTCTCTC          | AAAACCTTGGAGGCTCTGGT          |
| <b>At3g03780</b>     | TGCCTCCTGGATTGAGTTGATGAG      | GCCTTGCCTAACTTCAGTTGTACG      |
| <b>At3g11020</b>     | TCGAGATGAAGCGGATGCAAATCA      | TGAATGAACCTGGTCCCCATCAGA      |
| <b>At3g17465</b>     | GGATCATCGCGGTTAAGTGT          | GCACACCTTGTGCTCTGAAA          |
| <b>At3g18740</b>     | GTCCCATGAAGGAATCAACAGCAG      | CATTGTTGCCATTGTAGCGATGAAC     |
| <b>At3g18780</b>     | ACCTTGCTGGACGTGACCTTACTGAT    | GTTGTCTCGTGGATTCCAGCAGCTT     |
| <b>At3g28900</b>     | CCGCATCGTCAAACTCCTGGTG        | CGATCCTCTCCCTAACAGCAACTCC     |
| <b>At4g00100</b>     | CATGGGTCGTATGCACAGTC          | TCTTGACCTGAGGGATACCG          |
| <b>At4g25490</b>     | GCATGTCTCAACTTCGCTGA          | ATCGTCTCCTCCATGTCCAG          |
| <b>At4g33950</b>     | TTTGCCGATTATGCACGATA          | TGGCTAAATGGGTTGGTGT           |
| <b>At4g34000</b>     | AACCGTTCTCAACCTGCAAC          | TTGGAGTCAGATCAGGTGACAT        |
| <b>At4g38620</b>     | TCCCGGAATAAGCGACCATTTG        | TCACCGAGGAAGAAGACGAACTCA      |
| <b>At5g02940</b>     | AGAACCTTGGCACGGTATTTGTGG      | GGCAGCCCTTCAAACGATTTTGTGTC    |
| <b>At5g04620</b>     | TGTTGACGGTTTGTGTCAATGG        | TGATTCAGCGCATCAGAAAAGATGG     |
| <b>At5g15960</b>     | ACCAACAAGAATGCCTTCCA          | CCGCATCCGATACACTCTTT          |
| <b>At5g52310</b>     | TCACCGGAACTTTCTCATCC          | TGCTCTGTTTGGCTCCTCT           |
